# Supplementary material for: Apportionment of the airborne PM10 in Spain. Episodes of potential negative impact for human health
Source: Royal Society of Chemistry journal article supplement (doi:10.1039/c2em10802j), 2012-01-01
Supplement: c2em10802j.pdf [file c2em10802j.pdf]

SUPPLEMENTARY INFORMATION

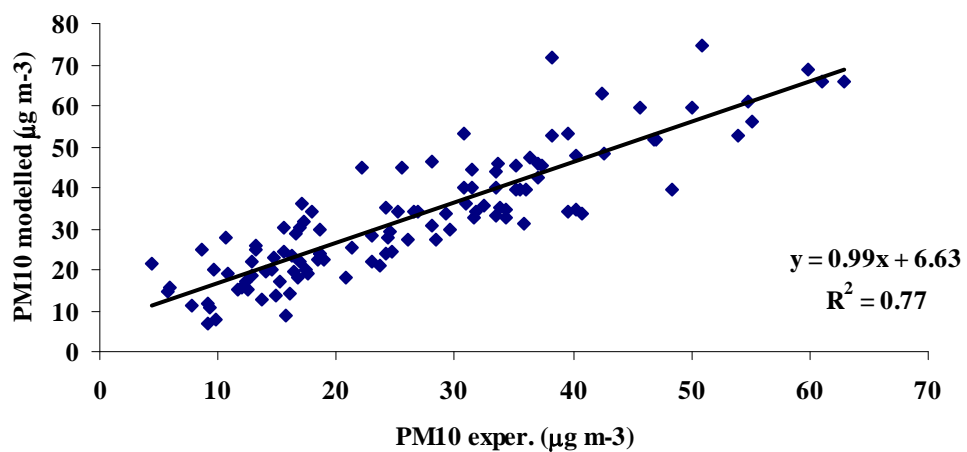

**Figure S1.** Plot between the experimental and the modelled PM10 obtained by the PCA-APCS receptor model ( $R^2$  = correlation coefficient).

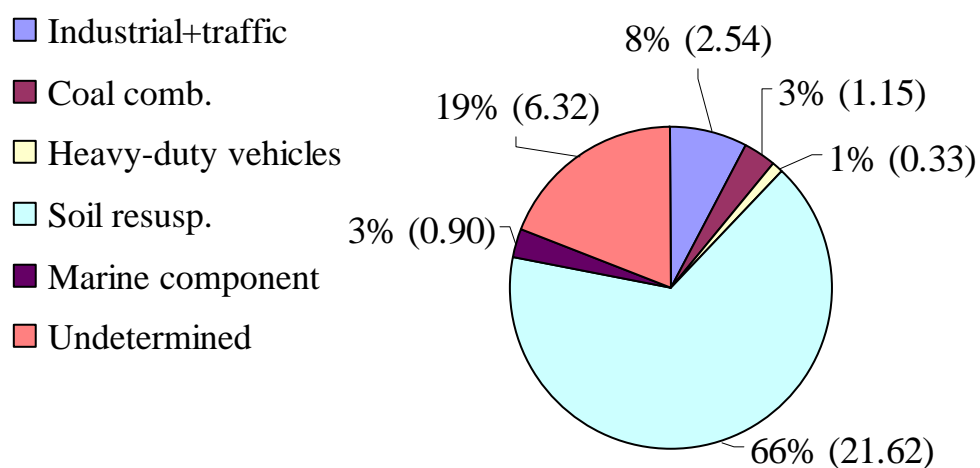

**Figure S2.** Source contribution (% and  $\mu\text{g m}^{-3}$ ) for the average PM10 samples obtained by the PCA-APCS receptor model.
